# Supplementary material for: Peptide-templated synthesis of branched MnO2nanowires with improved electrochemical performances
Source: Royal Society of Chemistry journal article supplement (doi:10.1039/c7ra00829e), 2017-01-01
Supplement: c7ra00829e1.pdf [file c7ra00829e1.pdf]

## *Electronic Supplementary Information*

### **Peptide-Templated Synthesis of Branched MnO<sub>2</sub> Nanowires with Improved Electrochemical Performances**

Mingxuan Du,<sup>a</sup> Yong Bu,<sup>a</sup> Yan Zhou,<sup>b</sup> Yurong Zhao,<sup>a</sup> Shengjie Wang,<sup>\*a</sup> and Hai Xu<sup>\*a</sup>

<sup>a</sup> State Key Laboratory of Heavy Oil Processing and Center for Bioengineering and Biotechnology,  
China University of Petroleum (East China), No. 66 Changjiang West Road, Qingdao 266580, China

<sup>b</sup> College of Science, China University of Petroleum (East China), No. 66 Changjiang West Road,  
Qingdao 266580, China.

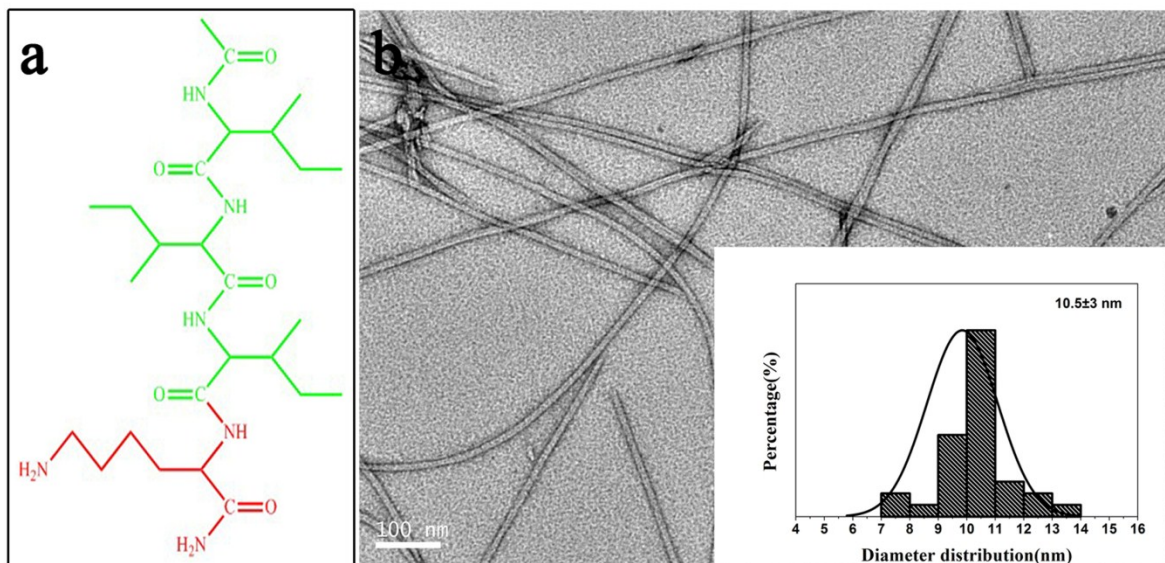

**Fig. S1** (a) Molecular structure of I<sub>3</sub>K and (b) TEM image of I<sub>3</sub>K nanofibers. The three Ile residues are marked in green and the Lys group at the C-terminal in red for clarity. Inset of (b) shows the statistical diameter histogram of the I<sub>3</sub>K nanofibers.

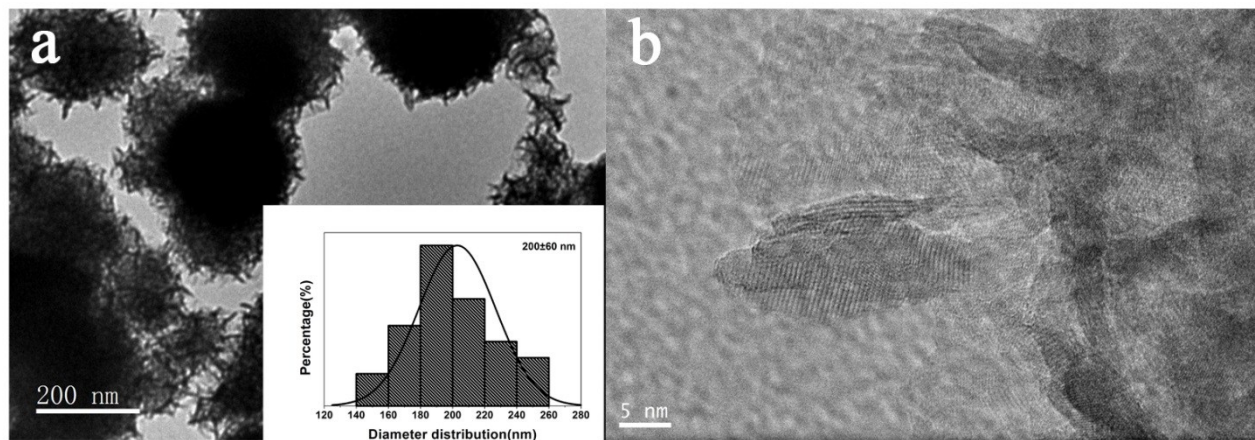

**Fig. S2** (a) TEM and (b) HR-TEM images of the MnO<sub>2</sub> precipitates formed in the absence of peptide (MP-0). Inset of (a) indicates the size distribution of the formed urchin-like MnO<sub>2</sub> spheres.

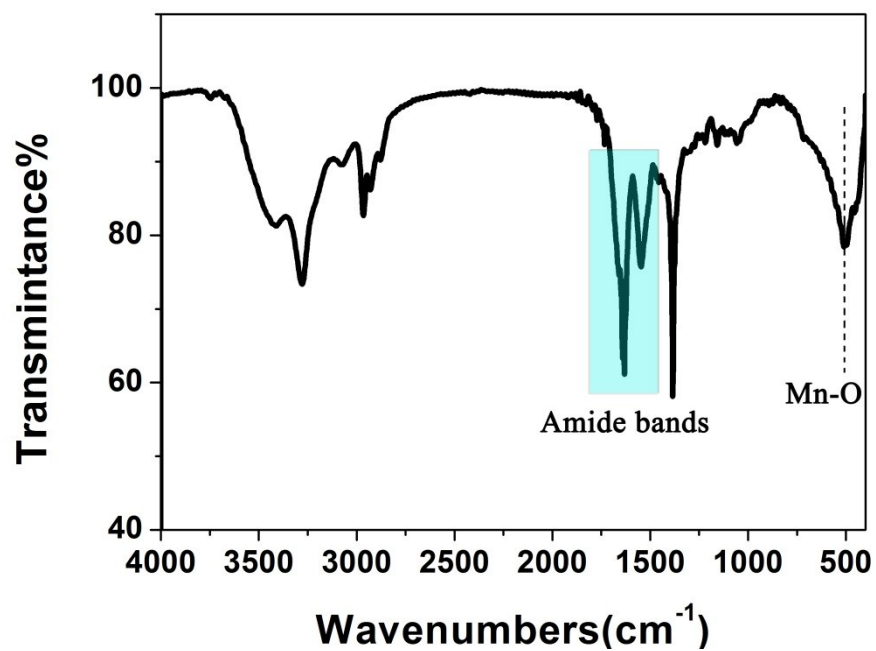

**Fig. S3** FTIR spectrum of the collected  $\text{MnO}_2$  precipitates in the presence of  $\text{I}_3\text{K}$  nanofibers (MP-5).

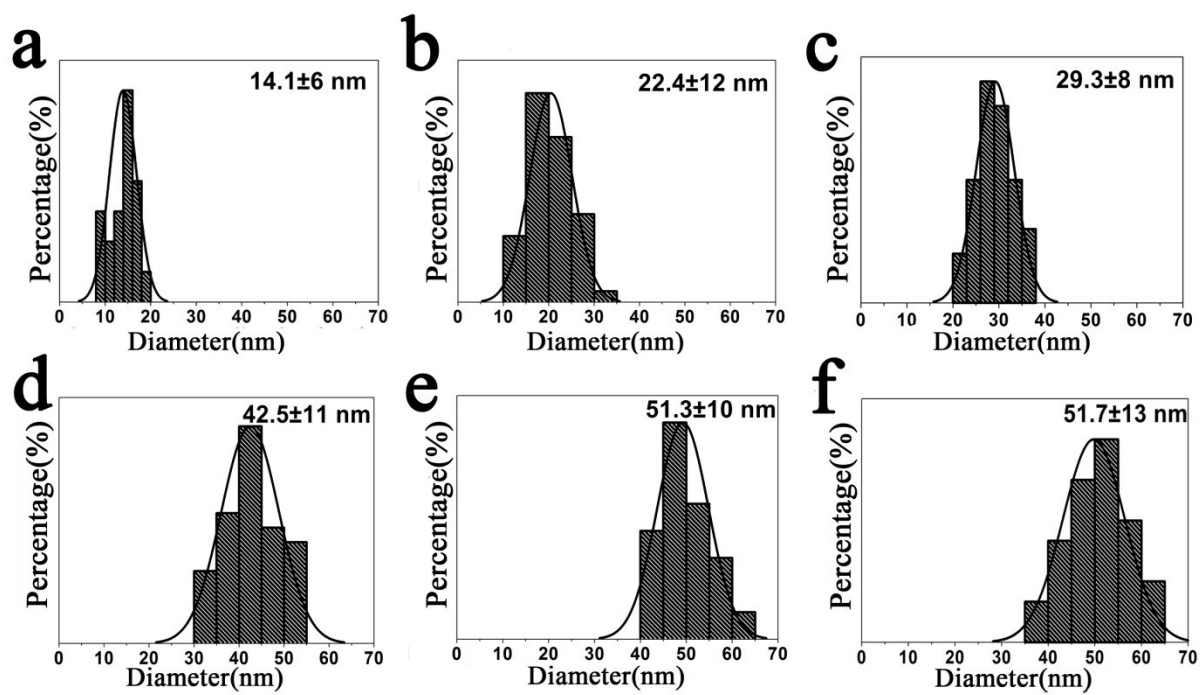

**Fig. S4** The diameter distributions of the formed MnO<sub>2</sub> hybrid nanowires: (a) MP-2, (b) MP-3, (c) MP-4, (d) MP-5, (e) MP-6, and (f) MP-7.

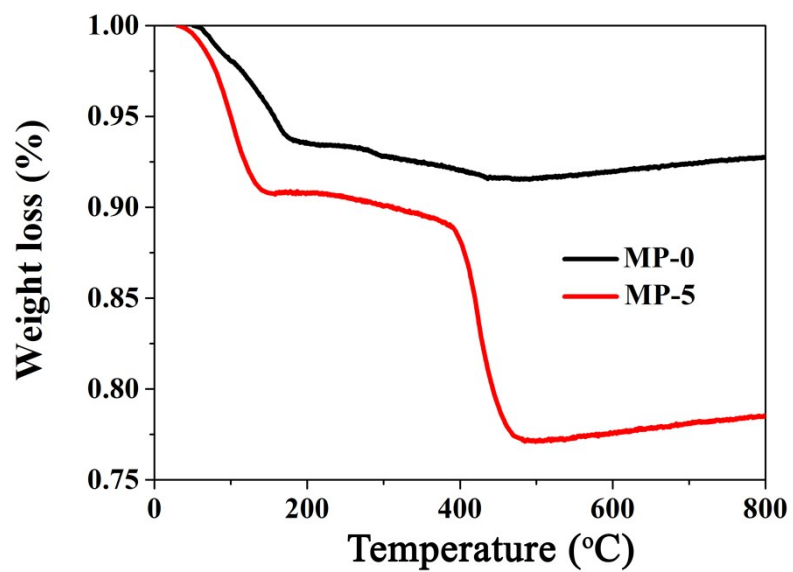

**Fig. S5** TGA curves of MP-5 and the urchin-like  $\text{MnO}_2$  sphere (MP-0) prepared in the absence of  $\text{I}_3\text{K}$  assemblies. The heating rate was set as  $20\text{ }^\circ\text{C min}^{-1}$ .

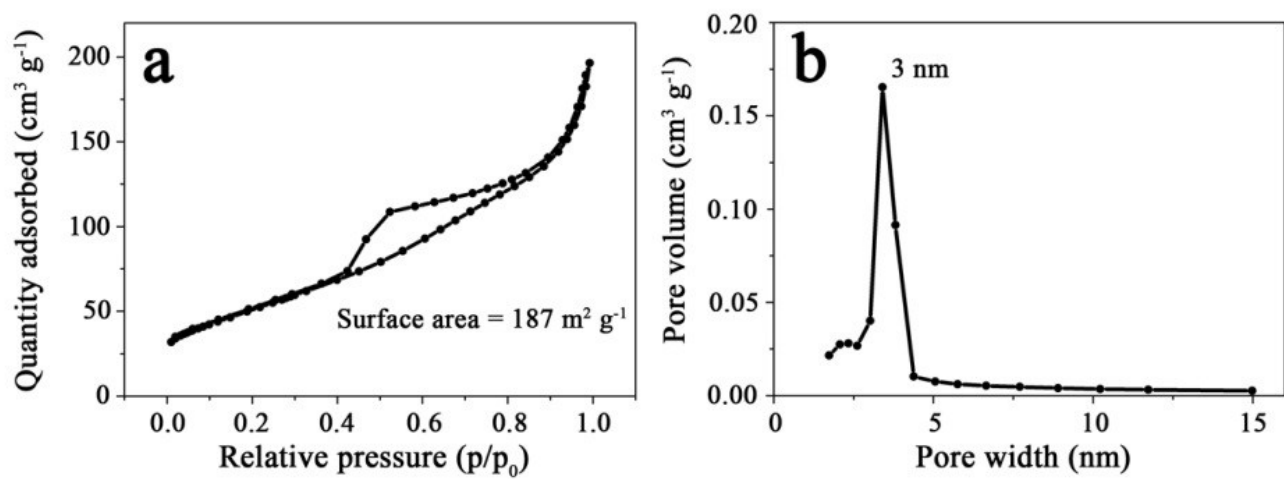

**Fig. S6** (a) N<sub>2</sub> adsorption/desorption isotherm and (b) BJH pore size distribution of MP-0.

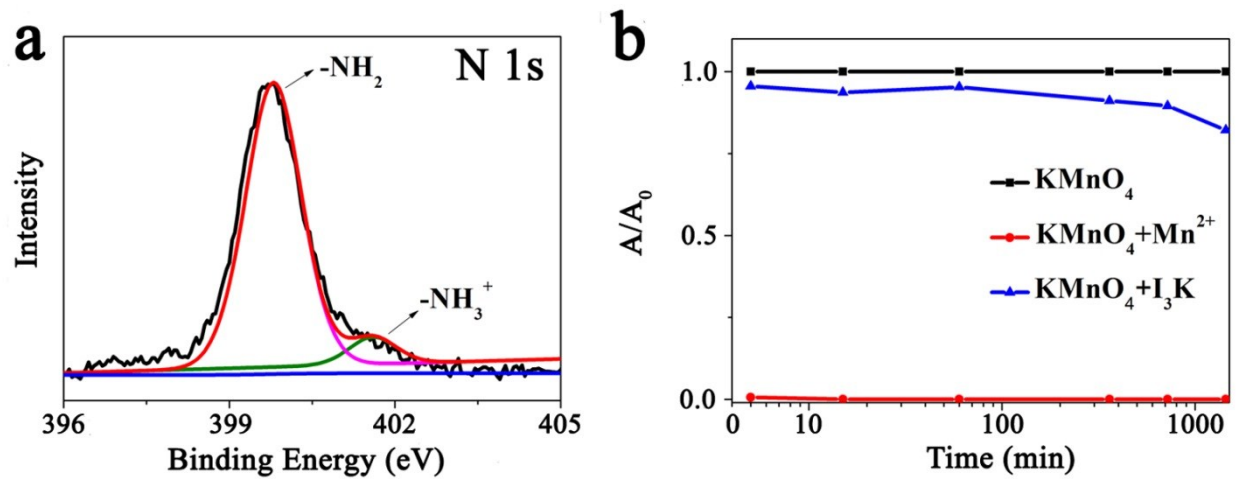

**Fig. S7** (a) N1s XPS spectrum of the branched  $\text{MnO}_2$  nanowire (MP-5) and (b) The UV-vis absorbance at 526 nm as a function of time for different reaction systems.

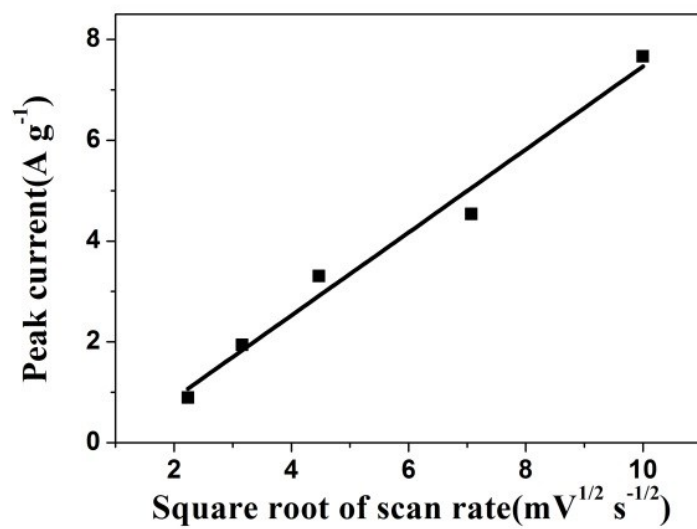

**Fig. S8** The anodic peak current versus the square root of scan rate for the branched MnO<sub>2</sub> nanowire (MP-5), showing a linear relationship between them.

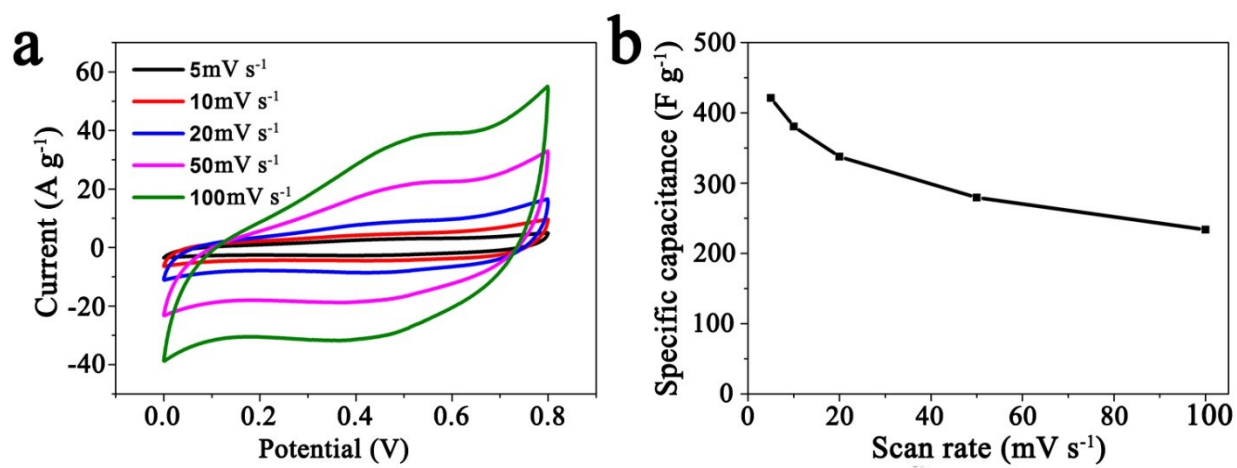

**Fig. S9** (a) CV curves of the branched MnO<sub>2</sub> nanowire (MP-5) as the electrode material in aqueous 1 M Na<sub>2</sub>SO<sub>4</sub> at different scan rates and (b) Variation of its specific capacitance with the scan rate.
